# Supplementary material
Source: ML conference proceedings conference paper supplement (https://proceedings.neurips.cc/paper_files/paper/2021/hash/7a1d9028a78f418cb8f01909a348d9b2-Abstract.html)
Supplement: Supplementary file 1 [file 7a1d9028a78f418cb8f01909a348d9b2-Supplemental.pdf]

## A Appendix

### A.1 Comparison of the power-of-two scaling factor parameterizations

This experiment compares different parameterizations of the power-of-two scaling factors on a 3-bit shift network. Our proposed method describe in Eq.8, and another is a staircase-like quantizer function. Besides different scaling factor parameterization, all other hyper-parameters and designs are the same as the experiments in Table 3 except for training epochs reduced to 120.

The design of the staircase-like quantizer is following the general practice of quantization-aware training. In 3bit shift network, the value of power-of-two scaling factors is limited to  $\{0, 1, 2\}$ . During the forward propagation, shift parameters rescale to the range of  $(-0.5, 2.5)$  based on their min and max, and then rounded. During the backward propagation, we use STE to estimate the gradient across the staircase-like quantizer function.

Our experiment results summarized in Table 5, it shows that our proposed parameterization of the power-of-two scaling factor improves the shift networks' performance.

Table 5: Comparison of power-of-two scaling factor parameterizations using ResNet-18 on ImageNet

| Parameterization of $2^p$ | ResNet-18 ImageNet | $\alpha$ |       |       |       |
|---------------------------|--------------------|----------|-------|-------|-------|
|                           |                    | 1e-2     | 1e-3  | 1e-4  | 1e-5  |
| Staircase-like function   | Top-1              | 68.58    | 68.58 | 68.52 | 68.59 |
|                           | Top-5              | 88.50    | 88.41 | 88.30 | 88.47 |
| Ours( $S^3$ )             | Top-1              | 69.78    | 69.85 | 69.84 | 69.82 |
|                           | Top-5              | 89.21    | 89.24 | 89.23 | 89.23 |

### A.2 Figures of the training epochs experiments

Figure 6 and 7 shows the training loss curves and testing accuracy curves of the training epochs experiments summarized in Table 4.

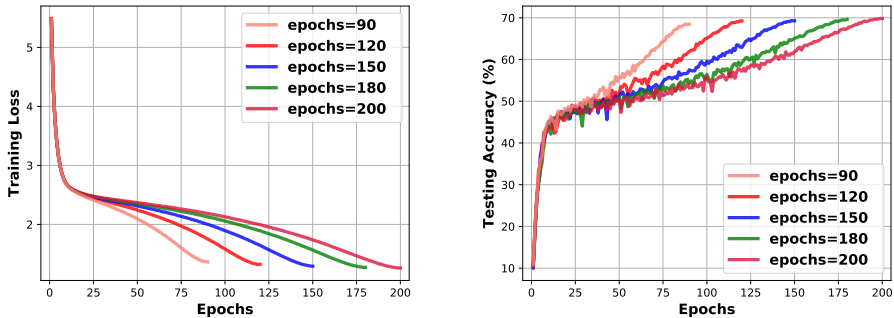

(a) Training Loss (b) Testing Accuracy  
Figure 6: Training epochs comparison using ResNet-18 trained on ImageNet

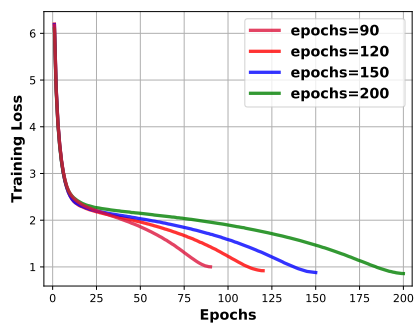

(a) Training Loss

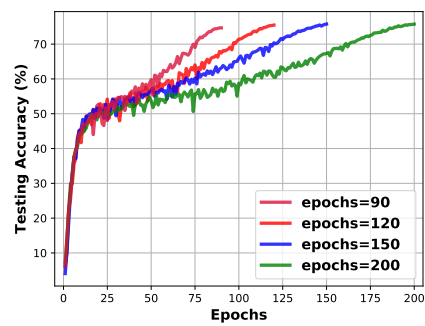

(b) Testing Accuracy

Figure 7: Training epochs comparison using ResNet-50 trained on ImageNet
